# Supplementary material
Source: publisher figshare collection journal article supplement (https://frontiersin.figshare.com/ndownloader/files/14081243)
Supplement: Supplementary file [file 14081243]

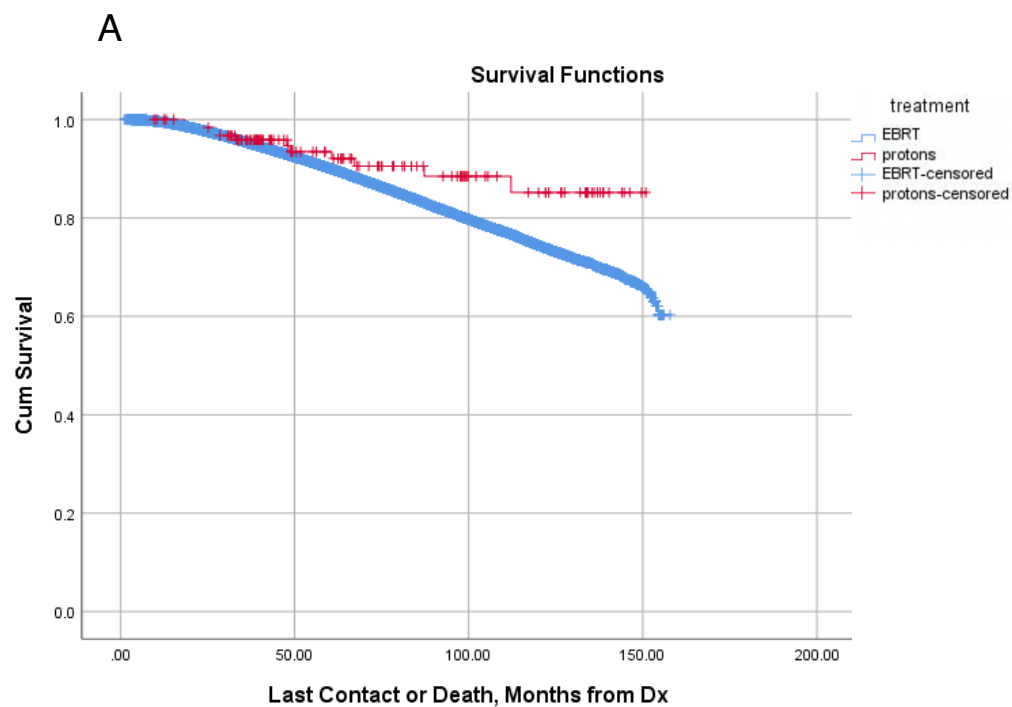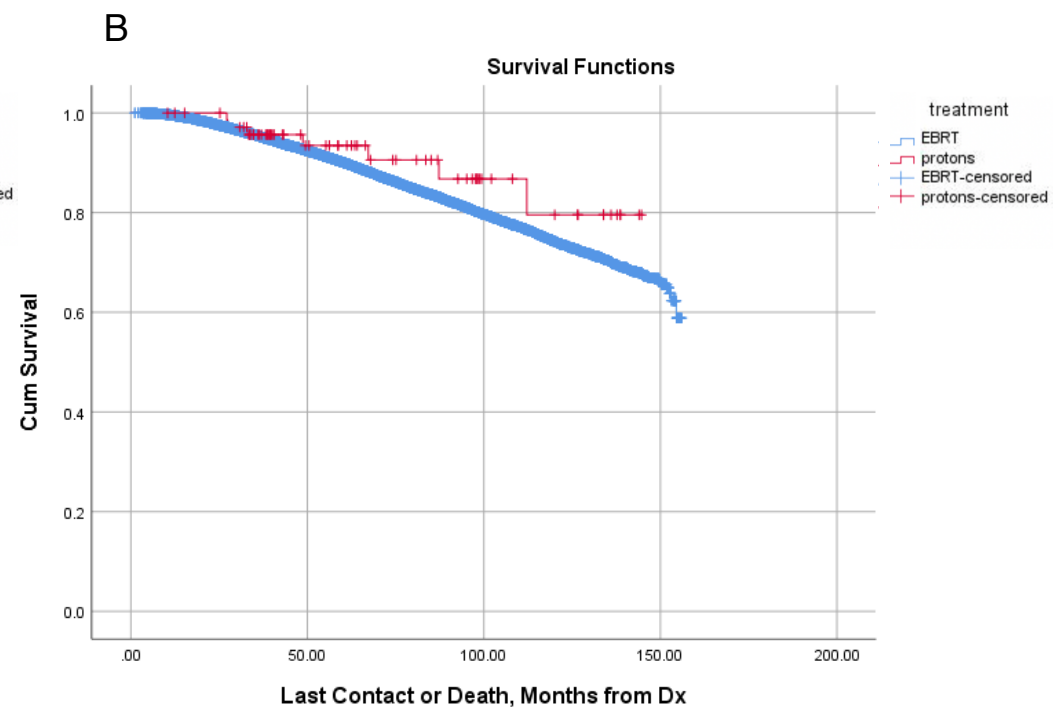

**Supplemental Figure 3:** Overall Survival with Proton vs. Non-Proton EBRT in Tumors located in Inner Quadrant (A) and Outer Quadrant (B) Cohorts

Inner Quadrant Cohort

5-year Overall Survival

- Non-Proton (EBRT): 90.1%
- Protons: 93.5%

p-value=0.055

Outer Quadrant Cohort

5-year Overall Survival

- Non-Proton (EBRT): 91.6%
- Protons: 93.2%

p-value=0.276
